# Supplementary material for: First-Principles Study of Silicon–Tin Alloys as a High-Temperature Thermoelectric Material
Source: MDPI journal article supplement (doi:10.3390/ma15124107), 2022-06-09
Supplement: s1 [file s1]

## Supporting Information

# First-Principles Study of Silicon-Tin Alloys as a High- Temperature Thermoelectric Material

Shan Huang, Suiting Ning and Rui Xiong\*

Key Laboratory of Artificial Micro- and Nano-Structures of Ministry of Education and School of Physics and Technology, Wuhan University, Wuhan 430072, China; shanhuang@whu.edu.cn (H.S.); stning@whu.edu.cn (S.N.)

\* Correspondence: xiongrui@whu.edu.cn (X.R.)

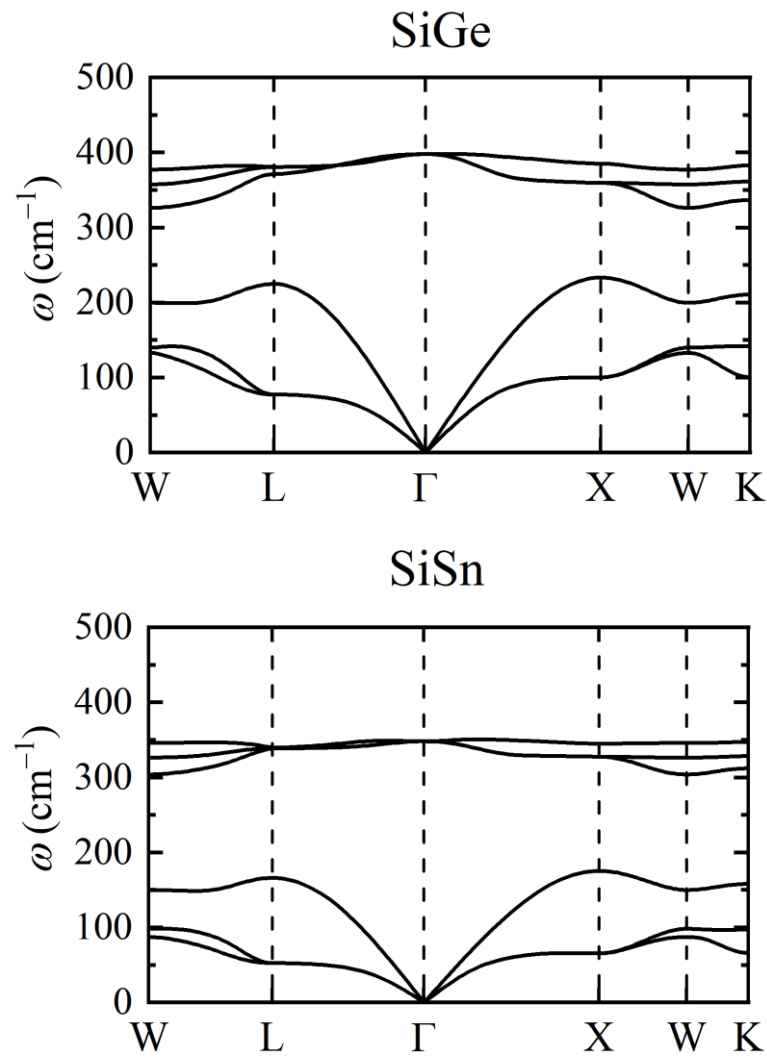

**Figure S1.** The phonon dispersion curves of SiGe and SiSn.
